# Supplementary material
Source: PubMed Central journal article supplement (PMC4468538)
Supplement: IAI.03129-14_zii999091285so1.pdf [file IAI.03129-14_zii999091285so1.pdf]

## Supplemental material

Fig. S1.

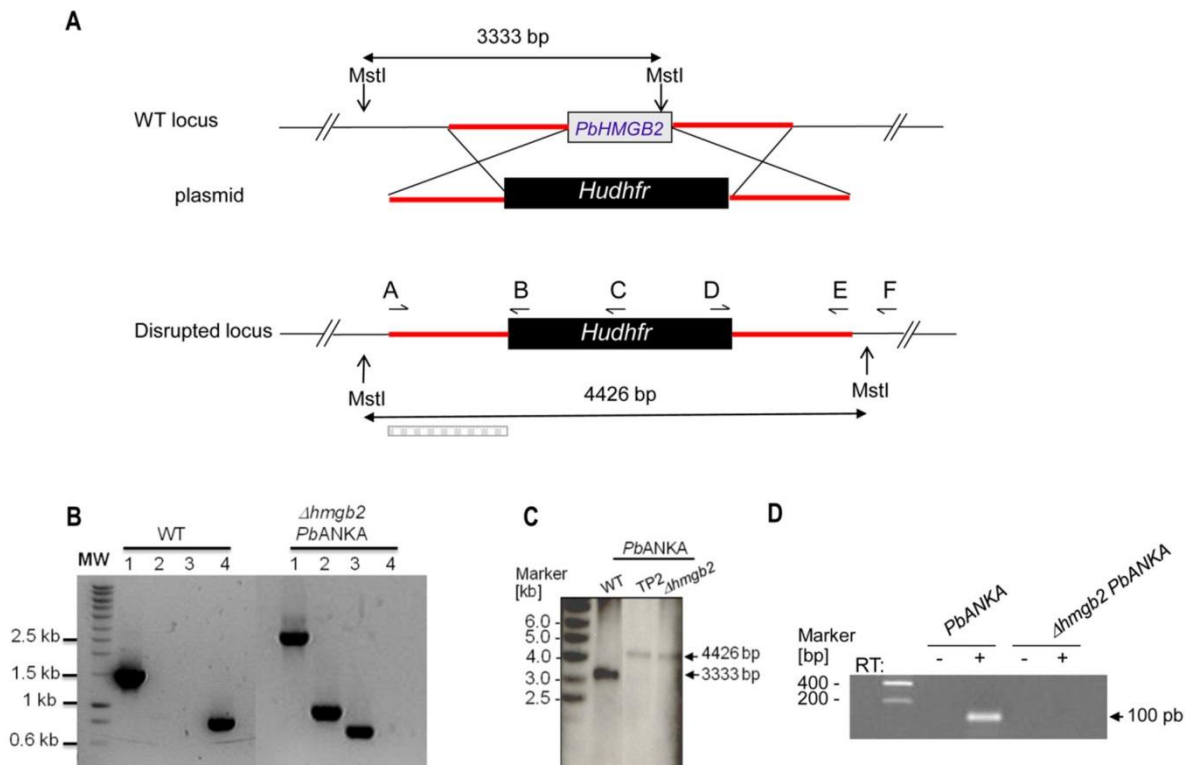

**Fig. S1. Disruption of the *pbhmg2* gene.**

**A.** Schematic representation of *pbhmg2* gene disruption by double cross-over homologous recombination. Sites of recombination are indicated by thick red lines. Genomic DNA from mutant and wild-type (WT) *PbANKA* and *PbNK65* parasites was digested by *MstI* for Southern blotting analysis. The position of the Southern probe is represented by the white bar (bottom of the figure). Predicted size of the fragments is indicated for each locus. Arrows show the position of primers used in the diagnostic PCR (see Table S1). **B.** Fifty ng of genomic DNA extracted from WT and  $\Delta hmgb2$  *PbANKA*, were analysed by the primers listed in Supporting information Table T1. The combinations of primers used for amplification are the following: lane 1 (A+E), lane 2 (D+F), lane 3 (A+B), lane 4 (A+C). **C.** Southern blot analysis of *MstI*-digested genomic DNA for the WT, transfer populations (TP) and one of the  $\Delta hmgb2$  clones. The predicted size of the expected fragments (Fig. S1A) is indicated on the right side of the figure. **D.** RT-qPCR analysis of *pbhmg2* expression in both WT and  $\Delta hmgb2$  *PbANKA* parasites following a reverse transcription step or not.

Fig. S2.

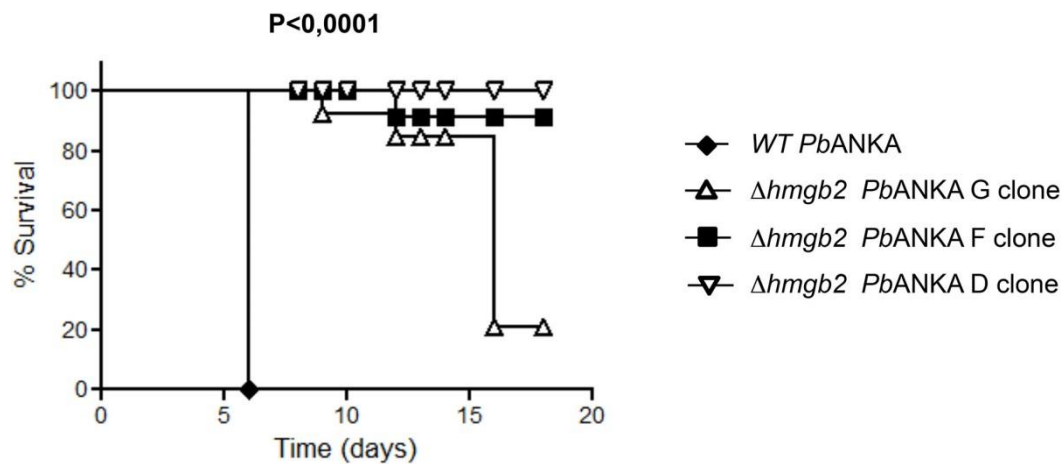

**Fig. S2. Kaplan-Meier survival plots of C57BL/6 infected with either *PbANKA* WT (ECM reference) or three  $\Delta hmgb2$  *PbANKA* clones.** C57BL/6 mice were infected by i.p. inoculation with  $10^5$  pRBCs WT and  $\Delta hmgb2$  *PbANKA* and monitored every day, starting on d5 p.i., for ECM symptoms. Significant differences in mortality/survival between WT and  $\Delta hmgb2$  *PbANKA* infected C57BL/6 were analysed by Log-rank test ( $p < 0.0001$ ,  $n=5$ ).

Fig. S3.

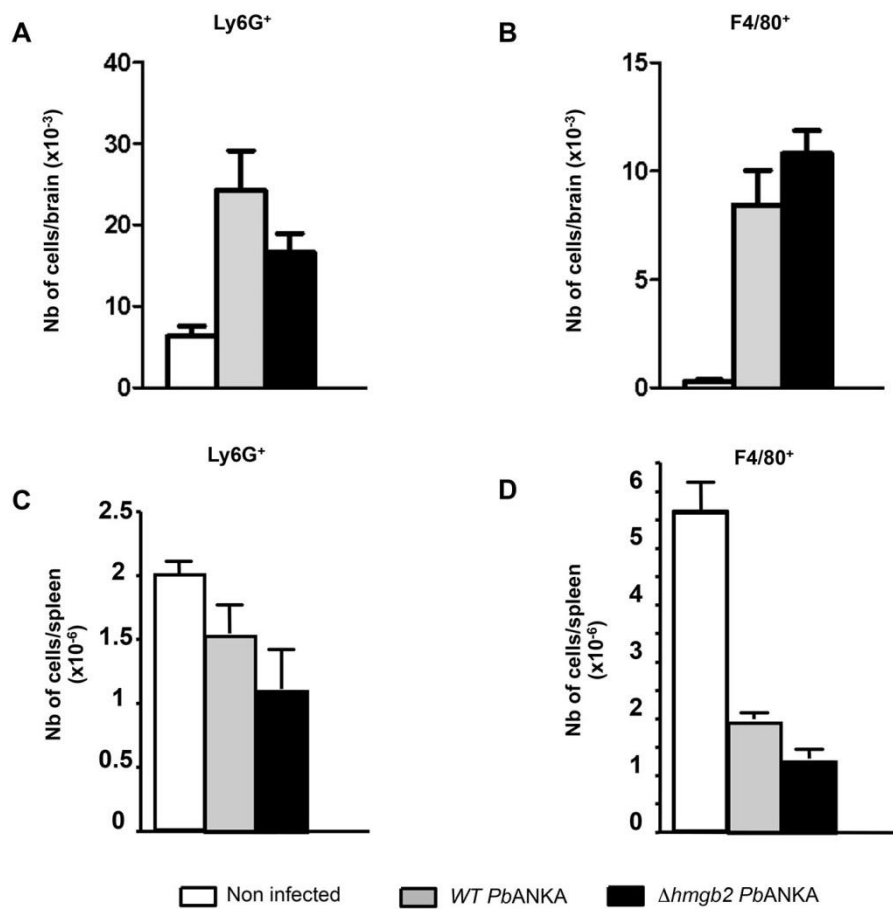

**Fig. S3. Determination of the number of polymorphonuclear neutrophils and macrophages in the brain and spleen of mice infected with WT or  $\Delta hmgb2$  *PbANKA* parasites.** At the coma stage (day 6 p.i.), brains and spleens from perfused WT or  $\Delta hmgb2$  *PbANKA*-infected C57BL/6 mice with  $10^5$  infected erythrocytes per mouse were taken and neutrophils and macrophages associated with cerebral and spleen tissue were analysed by FACS and expressed as absolute numbers per brain and spleen. Six mice per group were used. Experiment was reproduced twice.

Fig. S4

A Identity %.

DmHMG\_D 36% MSDKPKRPLSAYMLWLNARSRESIKREN--GIKVTEVAKRGGELWRAM--KDKSEWEAKAAKAKDDYDRAVKEFE

OsHMGB1 45% AGKDPNKPKRAPSAFFVFMEFRKFKKEKNPK-NKSVAAVGAAGDRWKSLEADKAPYVAKANKLKAENKAIAYN

GmHMG1 41% AAKDPNKPKRPPSAFFVFMEFRKVFNKEHPE-NKAVSAVGAAGAKWKTMSDAEKAPYVAKSEKRKVEYEKNMRAYN

BbNHP1 41% AAKDPNKPKRPPSAFFVFMEFRKVFNKEHPE-NKAVSAVGAAGAKWKTMSDAEKAPYVAKSEKRKVEYEKNMRAYN

MmHMG1\_B 42% FKDPNAPKRPPSAFFLFCSEYRPKIKGEHP--GLSIGDVAKKLGEMWNNTAADDKQPYEKKA AKLKEKYEKDIAAYR

HsHMG1\_B 42% FKDPNAPKRPPSAFFLFCSEYRPKIKGEHP--GLSIGDVAKKLGEMWNNTAADDKQPYEKKA AKLKEKYEKDIAAYR

HsHMG2\_B 40% KKDPNAPKRPPSAFFLFCSEHRPKIKSEHP--GLSIGDTAKKLGEMWSEQSAKDKQPYEQKAAKLKEKYEKDIAAYR

ScNHP6A 54% KKDPNAPKRALSAYMFFANENRDIVRSENPDIT--FGQVGGKLGKWKALTPEEKQPYEAKAQADKKRYESEKELYN

PvHMGB1 64% NKKDPHAPKRSLSAYMFFAKEKRAEIIISRPDLSKDVATVGMIGEAWNKLDEREKAPYEKKAQEDKLRVEREKVEYA

PkHMGB1 66% NKKDPHAPKRSLSAYMFFAKEKRAEIIISRPDLSKDVATVGMIGEAWNKLDEREKAPYEKKAQEDKVRVEREKVEYA

PyHMGB1 65% NKKDPHAPKRSLSAYMFFAKEKRAEIIITRPSLSKDVATVGMIGEAWNKLDEREKAPYEKKAQEDKIRYEKEMEYA

PbHMGB1 66% NKKDPHAPKRSLSAYMFFAKEKRAEIIITRPSLSKDVATVGMIGEAWNKLDEREKAPYEKKAQEDKIRYEKEMEYA

PfHMGB1 66% NKKDPHAPKRSLSAYMFFAKEKRAEIIISKPELSKDVATVGMIGEAWNKLGEKEKAPFEKKAQEDKLRYEKEMEA

PfHMGB2 94% KKDPLAPKRALSAYMFVVKDKRLEIIEKEPELAKDVAQVGKLIGEAWGQLSPAQKAPYEKKAQLDKVRYSEIEEYR

**PbHMGB2 100% KKDPLAPKRALSAYMFVVKDKRLEIIEKEPELAKDVAQVGKLIGEAWGQLSPAQKAPYEKKAQLDKVRYSEIEEYR**

PyHMGB2 100% KKDPLAPKRALSAYMFVVKDKRLEIIEKEPELAKDVAQVGKLIGEAWGQLSPAQKAPYEKKAQLDKVRYSEIEEYR

PkHMGB2 89% KKDPLAPKRALSAYMFVVKDKRLEIIEKEPELARNVAQVGKLVGEAWGKLSAAQKTPYEKKAQLDKVRYSEIEEYR

PvHMGB2 90% KKDPLAPKRALSAYMFVVKDKRLEIIEKEPELAKDVAQVGKLVGEAWGKLSAAQKTPYEKKAQLDKVRYSEIEEYR

MmGMG1\_A 30% KGDPPKPRGKMSYAFFVQTCREHKKKHPDASVNFSEFSKKCSERWKTMSAKEKGFEDMAKADKARYEREMKTYI

HsHMG1\_A 30% KGDPPKPRGKMSYAFFVQTCREHKKKHPDASVNFSEFSKKCSERWKTMSAKEKGFEDMAKADKARYEREMKTYIk

ZmMNB1b 30% AGKDPKKPRGKMSYAFFVQTCREHKKKHPDASVNFSEFSKKCSERWKTMSAKEKGFEDMAKADKARYEREMKTYI

HsHMG2\_A 32% KGDPNKPRGKMSYAFFVQTCREHKKKHPDSSVNFSEFSKKCSERWKTMSAKEKSKFEDMAKSDKARYDREMKNYV

Prim.cons. DPNAPKRALSAYMFVVKDKR3EIIKEPELSKDVAVGKIKIGEAWK2LSAAEKAPYEKKAQDKVRYEKEIEEYR

B

PfHMGB1 KKDHPHAPKRSLSAYMFFAKE  
PbHMGB1 KKDHPHAPKRSLSAYMFFAKE  
**MuHMGB2-B KKDHPHAPKRSLSAYMFFAKE**  
PfHMGB2 KKDPLAPKRALSAYMFVVKD  
PbHMGB2 KKDPLAPKRALSAYMFVVKD  
**MuHMGB1-B FKDPNAPKRPPSAFFLFCSE**  
\*\*\* \*\*\*, \*\*: : : . : . :  
  
PfHMGB2 KKDPLAPKRALSAYMFVVKD  
PbHMGB2 KKDPLAPKRALSAYMFVVKD  
PfHMGB1 KKDHPHAPKRSLSAYMFFAKE  
PbHMGB1 KKDHPHAPKRSLSAYMFFAKE  
**MuHMGB1-A KGDPPKPRGKMSYAFFVQTC**  
**MuHMGB2-A KGDPNKPRGKMSYAFFVQTC**  
\* \* \* \* . : \* : \* : . : . :

| Identity | Homology |
|----------|----------|
| 45 %     | 80 %     |
| 35 %     | 65 %     |

**A.** Multiple alignments of HMGB domains from several eukaryotic High Mobility Group B proteins including diverse *Plasmodium* proteins.

The various amino-acid (aa) sequences are taken from the previous article\*. The alignment was achieved by NPS@: Network Protein Sequence AnalysisTIBS\*\* programme as regards to the *Pb*HMGB2 protein sequence (highlighted in yellow) and the % of identity are included right part of the figure. Red stands for identical, blue and green for highly conserved aa. The TNF $\alpha$  activating domain is highlighted in grey i) for the both Hs HMGB proteins as the domain of HMGB1 box B was reported to bear *per se* the activating pro-inflammatory activity and ii) for the *Pb*HMGB2. Abbreviations are as follows: Bb, *Babesia bovis*; Dm, *Drosophila melanogaster*; Gm, *Glycine max*; Os, *Oryza sativa*; Pb, *Plasmodium berghei*; Pf, *Plasmodium falciparum*; Pk, *Plasmodium knowlesi*; Pv, *Plasmodium vivax*; Py, *Plasmodium yoelii*; Mu, *Mus musculus*; Sc, *Saccharomyces cerevisiae*; Zm, *Zea mays*. Bottom line corresponds to the consensus sequence.

**B.** Comparison of the TNF $\alpha$  activating domains of *P. falciparum* and *P. berghei* (in black) with that of the murine domain of Box A and Box B sequences (in red) of both HMGB1 and HMGB2 proteins. Identity and homology are indicated. \* stands for identical, : and . for highly and less similar aa, respectively

\* Briquet *et al.* 2006

\*\* Combet C., Blanchet C., Geourjon C. and Deléage G, Trends Biochem Sci, 2000; 25, N° 3 [291]:147-150

**Table S1.** List of the oligonucleotides used for PCR of wild-type and recombinant parasites. Capital letters refer to the oligonucleotide positions in Fig. S1A.

|                      |                                          |
|----------------------|------------------------------------------|
| Apal-5'hmgb2-For (A) | CGATGCGGGCCCAAAAAGGTAATATGAAAAAGAAAGTT   |
| Smal-5'hmgb2-Rev (B) | CGATGCCCCGGGTTTGCAATGGAAACATATCAGTT      |
| Nott-3'hmgb2-For (D) | CCAGTGAGTGCGGCCGCGAGCCTTTTGTATGTGCTTTTGG |
| Ascl-3'hmgb2-Rev (E) | AGCTGGCGCGCCAAGTATTGCAGTAGCATTTCCTTAAAT  |
| ORF-Rev (C)          | CCCAAGCTTCTCCAATTAGTTTTCCAACCTTGCAACTTC  |
| Ana-For (F)          | AAATGATTAGCTATAAAATAAGCGCAAAAATAATA      |
| huDHFR-For           | TGTTGTCTCTTCAATGATTCATAAATAGTTGG         |
| huDHFR-Rev           | TGCTTTGAGGGGTGAGCATTAAAGC                |

**Table S2.** List of the oligonucleotides used for the transcript analyses by RT-qPCR.

|                 |                      |                                                              |
|-----------------|----------------------|--------------------------------------------------------------|
| pbhmg2          | 101-For<br>201-Rev   | AAAAGAGAGCAGAGATAATAACTCGAGATC<br>CCTTTCGTCTAATTTATTCCATGCTT |
| mu hmgb1        | 415-For<br>516-Rev   | AGTTCAAGGACCCCAATGCAC<br>TGGATAAGCCAGGATGCTCG                |
| mu hmgb2        | 14-For<br>115-Rev    | GCGGAGAAGCTGCAAAACAA<br>CTTCCTCAGACCTCGCA                    |
| mu tnfa         | 1032-For<br>1133-Rev | GAAACACAAGATGCTGGGACAGT<br>GACATTCGAGGCTCCAGTGAAT            |
| mu il-6         | 55-For<br>155-Rev    | CTTCCATCCAGTTGCCTTCTTG<br>TGGGAGTGGTATCCTCTGTGAAGT           |
| mu il-10        | 113-For<br>213-Rev   | TGACTGGCATGAGGATCAGC<br>AGTCCGCAGCTCTAGGAGGCA                |
| mu hprt         | For<br>Rev           | GTTGGATACAGGCCAGACTTTGTTG<br>GATTC AACCTTGCGCTCATCTTAGGC     |
| mu ifn $\gamma$ | For<br>Rev           | CACACTGCATCTTGGCTTTG<br>TCTGGCTCTGCAGGATTTTC                 |
| mu icam-1       | For<br>Rev           | CGAAGGTGGTTCTTCTGAGC<br>GTCTGCTGAGACCCCTCTTG                 |
| mu vcam-1       | For<br>Rev           | AGTCCGTTCTGACCATGGAG<br>TGCTGGAGCCAAACACTTG                  |
| mu hmox1        | For<br>Rev           | TCTCAGGGGGTCAGGTC<br>GGAGCGGTGTCTGGGATG                      |
| pb 18S          | 1827-For<br>1927-Rev | ATTAATCTTGAACGAGGAATGGCT<br>TCAATCGGTAGGAGCGACG              |
